# Supplementary material for: Probing the HIV-1 Genomic RNA Trafficking Pathway and Dimerization by Genetic Recombination and Single Virion Analyses
Source: PLOS journal article supplement (doi:10.1371/journal.ppat.1000627), 2009-10-15
Supplement: S2 (10.1371/journal.ppat.1000627.s002) [file journal.ppat.1000627.s002]

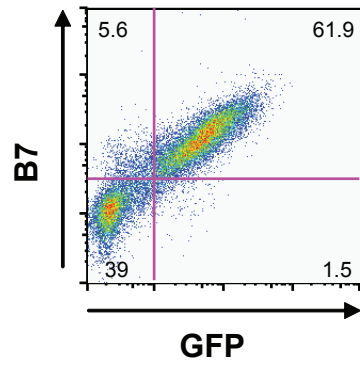

Moore et al Supplemental Figure 2
